# Supplementary material for: Widespread submarine volcanic eruptions and tectonics revealed in the northwest Pacific Ocean
Source: Research Square preprint supplement (doi:10.21203/rs.3.rs-7502124/v1), 2025-10-01
Supplement: Supplementary file 1 [file f0e14297cf6098ddc70e7751.pdf]

Supplementary Information for

## **Widespread submarine volcanic eruptions and tectonics revealed in the northwest Pacific Ocean**

Juan Zhu<sup>1</sup>, Lianxing Wen<sup>2\*</sup>

<sup>1</sup>Laboratory of Seismology and Physics of Earth's Interior, School of Earth and Space  
Sciences, University of Science and Technology of China; Hefei, 230026, China.

<sup>2</sup>Department of Geosciences, State University of New York at Stony Brook; NY 11794, USA.

\*Correspondence to: [Lianxing.Wen@stonybrook.edu](mailto:Lianxing.Wen@stonybrook.edu) (L.W.)

## 14    **Table of Contents**

|    |                                                                                               |
|----|-----------------------------------------------------------------------------------------------|
| 15 | Supplementary Note 1   Hydroacoustic data.                                                    |
| 16 | Supplementary Note 2   Elimination of air-gun shot sources and other disturbed sources.       |
| 17 | Supplementary Note 3   Verification of explosive submarine volcanic eruption.                 |
| 18 | Supplementary Fig. 1   H11 hydrophone array used to study explosive submarine volcanoes.      |
| 19 | Supplementary Fig. 2   Detection discriminants for an explosive submarine volcanic eruption   |
| 20 | at hydrophone station H11S2.                                                                  |
| 21 | Supplementary Fig. 3   Detection discriminants for an explosive submarine volcanic eruption   |
| 22 | at hydrophone station H11S3.                                                                  |
| 23 | Supplementary Fig. 4   Waveform characteristics of air-gun shot signals.                      |
| 24 | Supplementary Fig. 5   Similar seismic discriminants for an example air-gun shot indicated in |
| 25 | Supplementary Fig. 4 and an explosive submarine volcanic eruption.                            |
| 26 | Supplementary Fig. 6   Source characteristics of air-gun shot signals.                        |
| 27 | Supplementary Fig. 7   Discolored water spreading in a lotus pattern at 04:51 UTC on February |
| 28 | 4, 2010 observed by a local flyover photo near the sea surface of the Fukutoku-Okanoba.       |
| 29 | Supplementary Fig. 8   Detection and verification of explosive submarine volcanic eruptions   |
| 30 | of Fukutoku-Okanoba in the northwest Pacific Ocean.                                           |
| 31 | Supplementary Fig. 9   Detection and verification of explosive submarine volcanic eruptions   |
| 32 | of Kaitoku in the northwest Pacific Ocean.                                                    |
| 33 | Supplementary Fig. 10   Detection and verification of explosive submarine volcanic eruptions  |
| 34 | of Ahyi in the northwest Pacific Ocean.                                                       |
| 35 | Supplementary Fig. 11   Detection and verification of explosive submarine volcanic eruptions  |
| 36 | of South Sarigon in the northwest Pacific Ocean.                                              |
| 37 | Supplementary References                                                                      |

## **Supplementary Note 1 | Hydroacoustic data**

We use continuous hydroacoustic data recorded from 1 January, 2010 to 13 December, 2022 by the H11 hydrophone array located near the Wake Island of the Northwest Pacific Ocean (Supplementary Fig. 1). The H11 hydrophone array is operated by the CTBTO and consists of two hydrophone subarrays (H11N and H11S) separated by about 135 km. Each subarray is equipped with three hydrophone stations situated in a triangle of a 2.0-km spacing (Supplementary Fig. 1). Hydrophones are moored in the SOFAR channel axis at water depths of 731 m (H11N1), 732 m (H11N2), 729 m (H11N3), 750 m (H11S1), 742 m (H11S2) and 726 m (H11S3) (Supplementary Fig. 1). Hydrophone sensors have a flat frequency response from 10 Hz to 100 Hz and a sampling rate of 250 Hz<sup>1</sup>. Data are band-pass filtered between 6 Hz and 60 Hz in accordance with the frequency character of the signals typically associated with submarine volcanic activity<sup>2-5</sup> while minimizing potential noise contamination in other frequencies from ocean microseism<sup>6</sup>, marine mammal vocalization<sup>7</sup>, and commercial shipping<sup>8</sup>.

## **Supplementary Note 2 | Elimination of air-gun shot sources and other disturbed sources**

Air-gun shot sources are underwater anthropogenic explosive sources in the shallow water that could last for tens of hours with usually a fixed time interval between consecutive signals (Supplementary Fig. 4)<sup>9,10</sup>. They satisfy the discriminant criteria for an explosive submarine volcanic eruption, with a short and impulsive waveform, and inversed dispersion of frequency, and an irregular slow-decaying spectrum of the recorded signals (Supplementary Fig. 5). Typically, air-gun shot signals exhibit highly similar spectrum and waveforms (Supplementary Fig. 6). We remove the air-gun shot sources based on regularity of the time intervals and similarity of the waveforms between consecutive signals. In the first step, we identify air-gun

shot signals based on the equal time intervals between consecutive signals. If the two time-intervals range in 8-40 s and are equal or multiplicative between consecutive signals in each three subsequent signals, we identify the detected events as air-gun shots and remove them from the detection list. In the second step, we randomly select an identified air-gun shot event as a template and remove the events that have waveform cross-correlation coefficients larger than 0.6 with the template. The templates are selected within each 3-hour from those air-gun shots identified in the first step with a signal amplitude greater than 0.8 times the largest amplitude of all the identified events in the time period.

### **Supplementary Note 3 | Verification of explosive submarine volcanic eruption**

There is no spatial or temporal overlap between the detected explosive submarine volcanic eruptions and the reported earthquakes in the catalogs from the U.S. Geological Survey (USGS) and the International Seismological Center (ISC) in the four regions of the Fukutoku-Okanoba, Kaitoku, Ahyi and South Sarigon seamounts. Many detected explosive submarine volcanic eruptions in those four regions can be independently confirmed by the observational eruption evidence of discolored surface ocean water, bathymetry changes, tsunamis, lava flows, pumice rafts and ash-steam plumes. We show an example for the detected Fukutoku-Okanoba submarine volcanoes (Supplementary Fig. 7). Two visible ash-steam plume eruptions and 67 discolorations of water on the sea surface were documented and time-stamped in the Fukutoku-Okanoba submarine volcano region, by vision aerial and satellite observations and pumice rafts conducted by the Japan Meteorological Agency (JMA) during 2010-2022<sup>11-14</sup>. Among the 471 explosive submarine volcanic eruptions detected in Fukutoku-Okanoba (Supplementary Fig. 8a), 300 events occurred within a week from the two observed plumes on 03 February, 2010 and August 15, 2021 and 45 observed events of discolored surface sea water

(Supplementary Fig. 8). The other 171 detected events occurred in the time windows of no collection of visual evidence (Supplementary Fig. 8). There are 22 observed events of discoloration of water with no associated explosive submarine volcanic eruptions detected. In those events, the discoloration of water occurred in small areas, likely caused by small eruptions that escape the detection by the hydroacoustic data. Similarly, more than 88% of the detected explosive submarine volcanic eruptions around Kaitoku, Ahyi and South Sarigon seamounts can also be verified by the observed discoloring events in both the occurring time and geographical location (Supplementary Figs. 9-11).

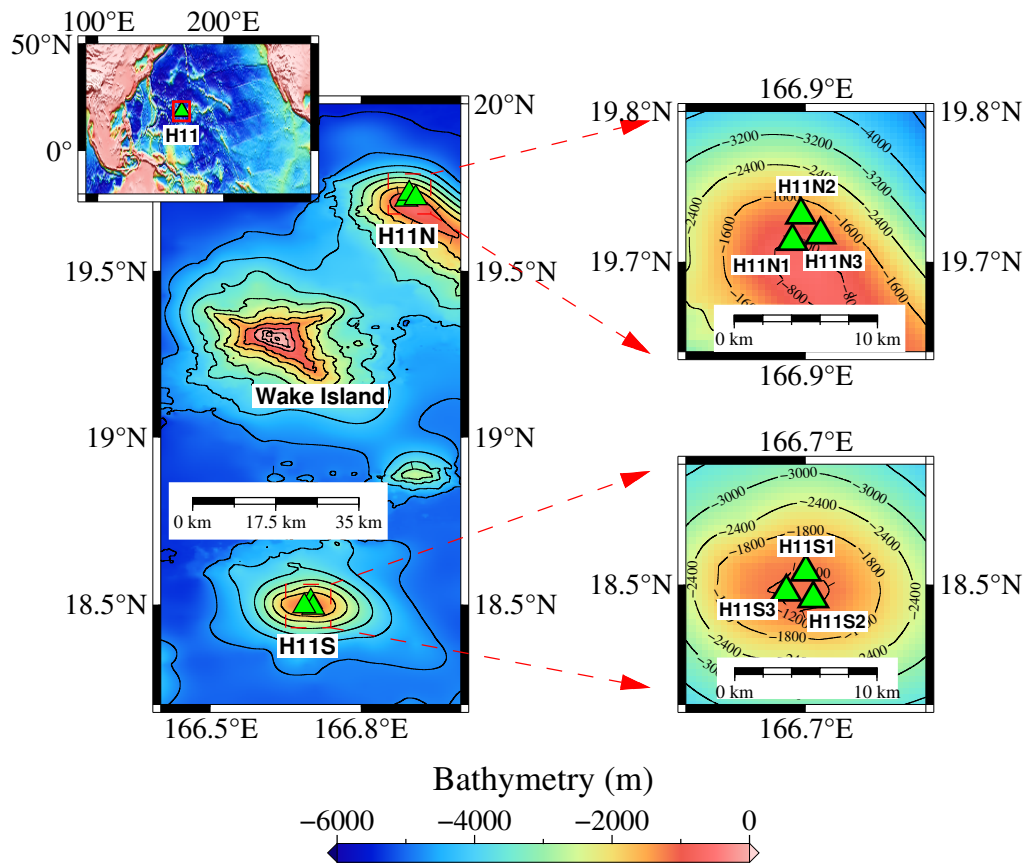

**Supplementary Fig. 1 | H11 hydrophone array used to study explosive submarine volcanoes.** Northern and southern subarrays (green triangles) are labeled as H11N and H11S respectively. Regions of red dashed box are enlarged and shown in the right panels with individual hydrophone stations labeled. Left-top inset shows the region (red box) in a broader region of the Pacific Ocean. Background color and black contours show bathymetry<sup>15</sup>.

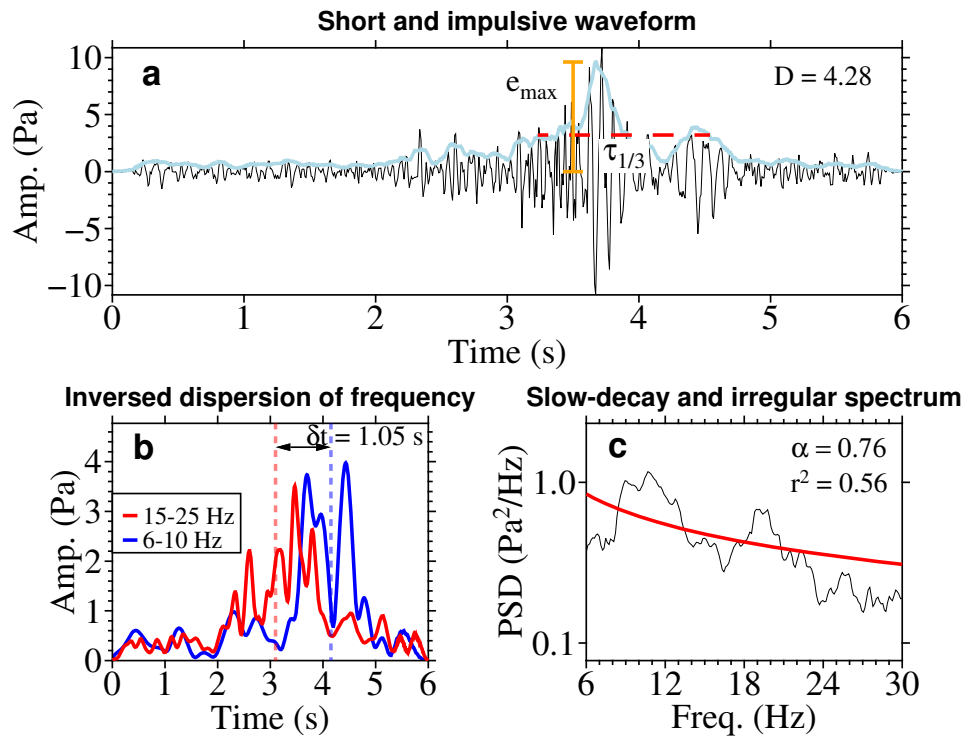

**Supplementary Fig. 2 | Same as Extended Data Fig. 2, except for hydrophone station H11S2.**

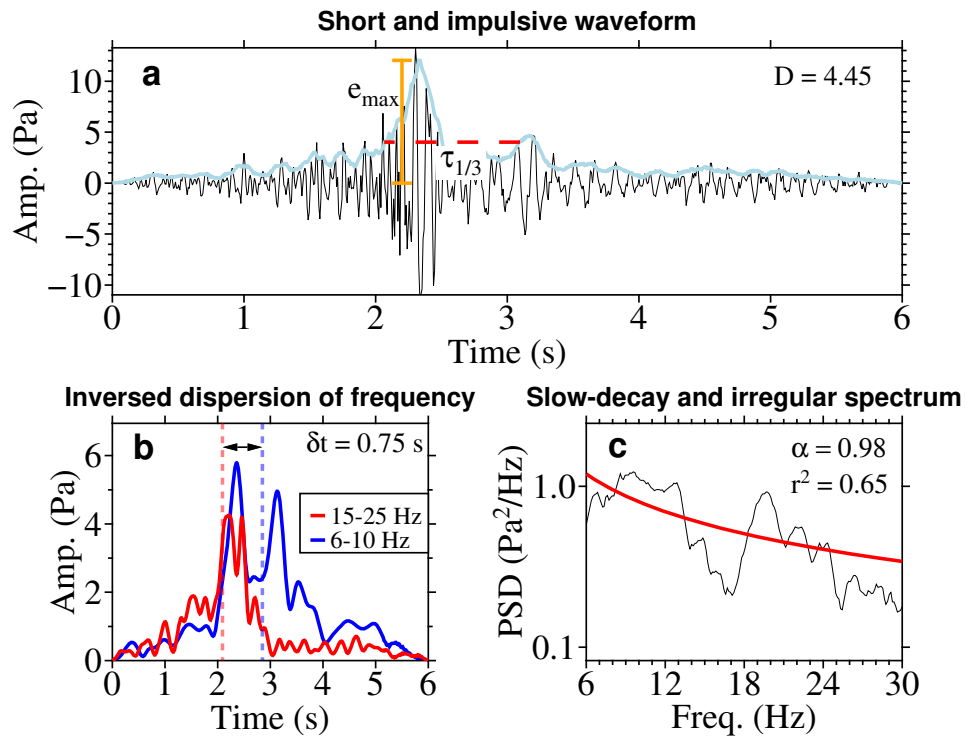

**Supplementary Fig. 3 | Same as Extended Data Fig. 2, except for hydrophone station H11S3.**

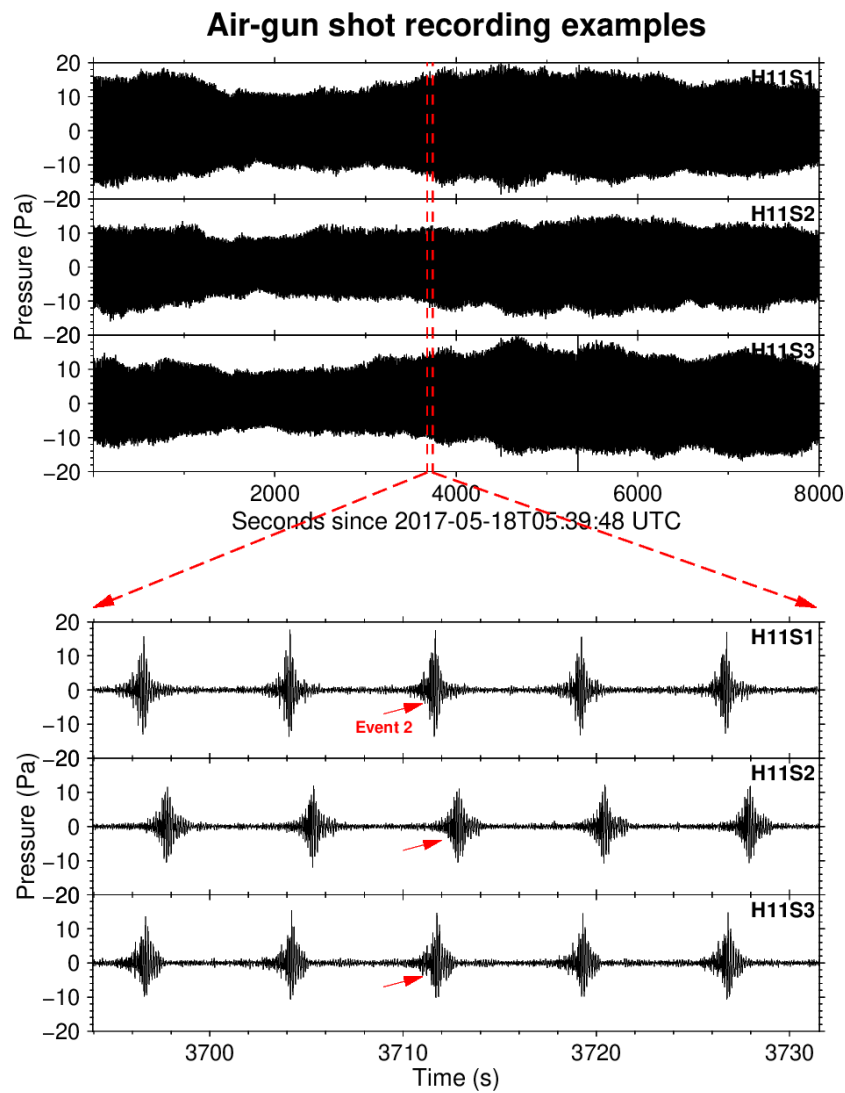

**Supplementary Fig. 4 | Waveform characteristics of air-gun shot signals.** (Top) 8000-s pressure recordings of air-gun shot signals at hydrophones H11S1, H11S2 and H11S3. (Bottom) Enlarged pressure recordings in the time window between the red dashed lines in the top panel. Red arrows in the bottom panel indicate an air-gun shot signal that is used to show its possession of similar seismic discriminants for the detection of an explosive submarine volcanic eruption in Supplementary Fig. 5.

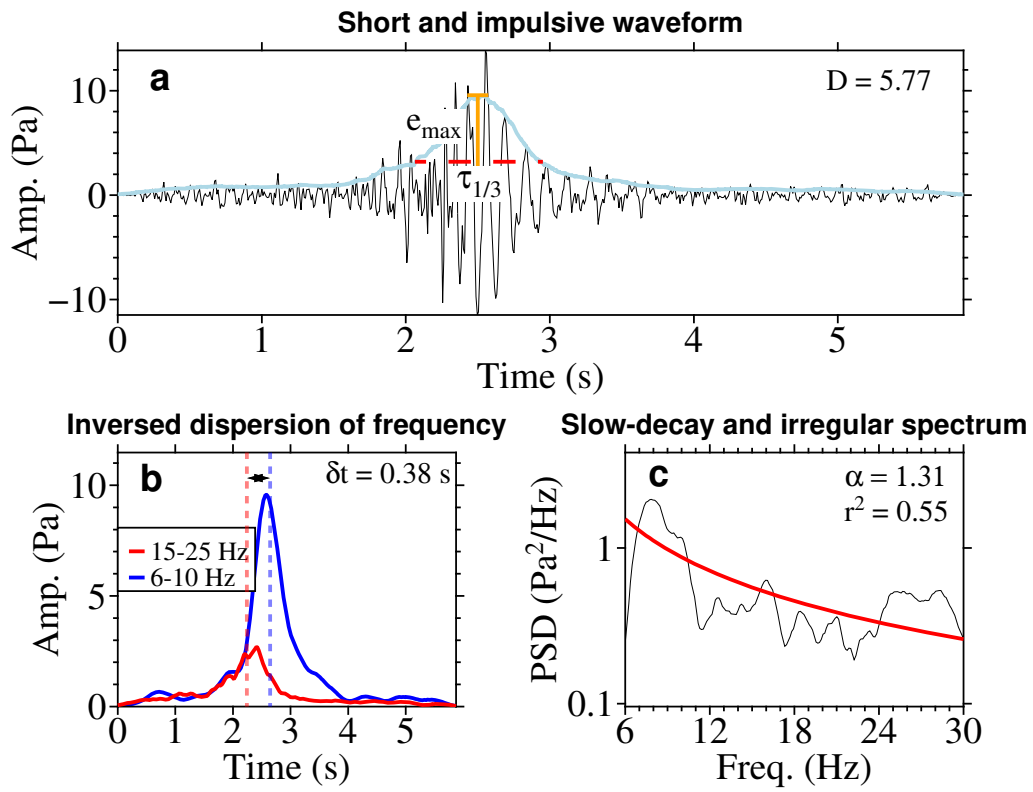

**Supplementary Fig. 5 | Same as Extended Data Fig. 2, except for an example air-gun shot indicated in Supplementary Fig. 4. Note the similarities of seismic discriminants between Supplementary Fig. 5 and Extended Data Fig. 2.**

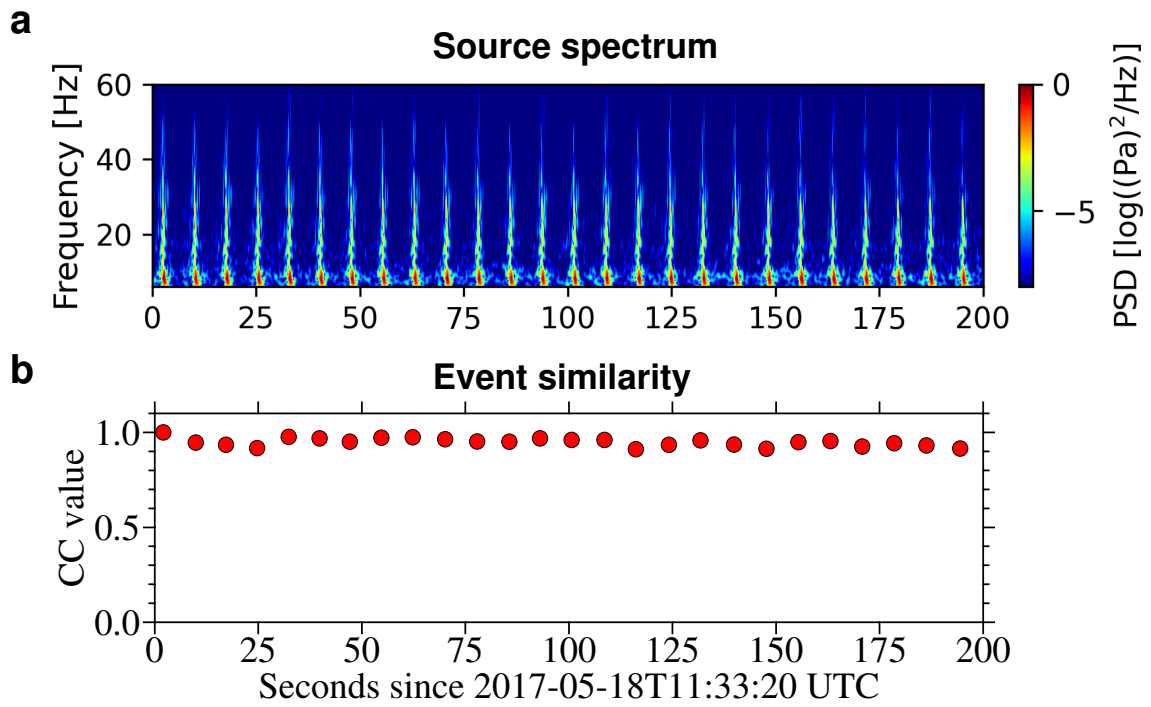

**Supplementary Fig. 6 | Source characteristics of air-gun shot signals.** (a) Source spectrum and (b) waveform similarity of example air-gun shot signals taken from 11:33:20 to 11:36:40 UTC, on May 18, 2017. Red dots in **b** represent the cross-correlation values for each signal with the first signal in the time window. Note the similarities of source spectrum and waveforms between air-gun shots.

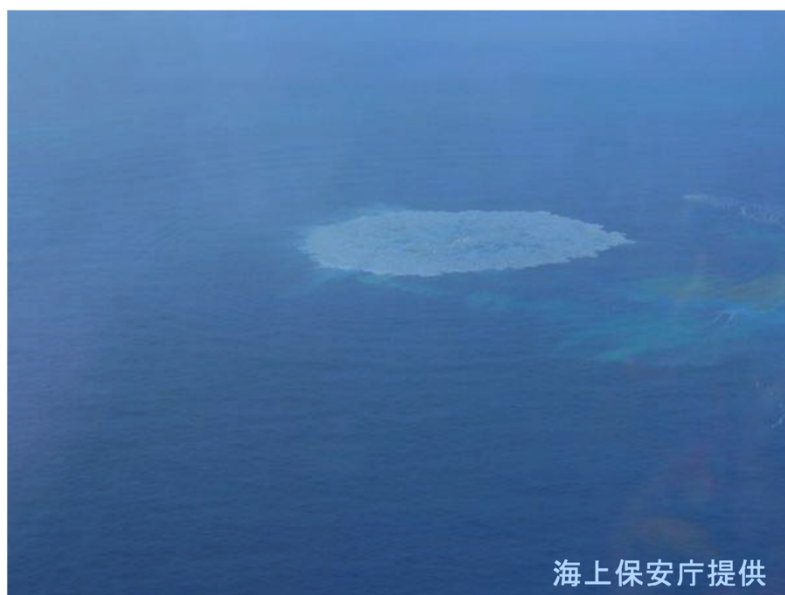

131

132 **Supplementary Fig. 7 | Discolored water spreading in a lotus pattern at 04:51 UTC on**  
133 **February 4, 2010 observed by a local flyover photo near the sea surface of the Fukutoku-**  
134 **Okanoba.** The source is issued by the Japan Meteorological Agency (JMA).

135

# Verification of explosive submarine volcanic eruptions in Fukutoku-Okanoba

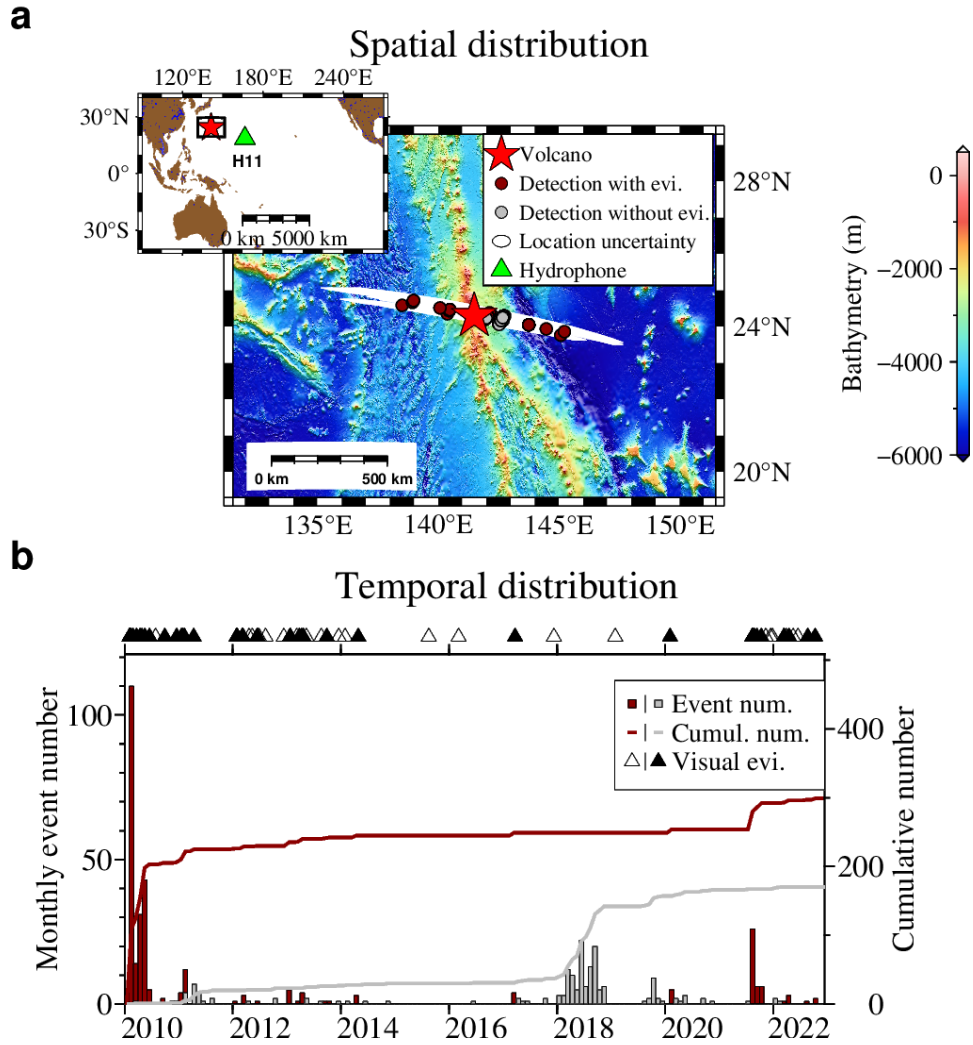

**Supplementary Fig. 8 | Detection and verification of explosive submarine volcanic eruptions of Fukutoku-Okanoba in the northwest Pacific Ocean.** **a**, Locations of the detected explosive submarine volcanic eruptions around Fukutoku-Okanoba (red star), with those of red dots verified by the observed ocean surface coloring and those of gray dots without verifiable ocean surface observation. White ellipses represent errors of the determined locations of the events. The background color marks bathymetry. The left-top inset shows the region (black box) in a broader region with the H11 hydrophone array (green triangle). **b**, Numbers of the detected explosive submarine volcanic eruptions from 2010 to 2022, with the monthly numbers represented by bars (the left vertical axis for scale), and the cumulative numbers represented by curves (the right vertical axis for scale). The bars and curves are color-

147 coded with the dots in **a**. Symbols above the panel indicate the observed visual eruption events,  
148 with filled and blank triangles representing visual eruption events with and without associated  
149 detections of submarine volcanic eruption within a week of the event.  
150

Verification of explosive submarine volcanic eruptions  
in Kaitoku

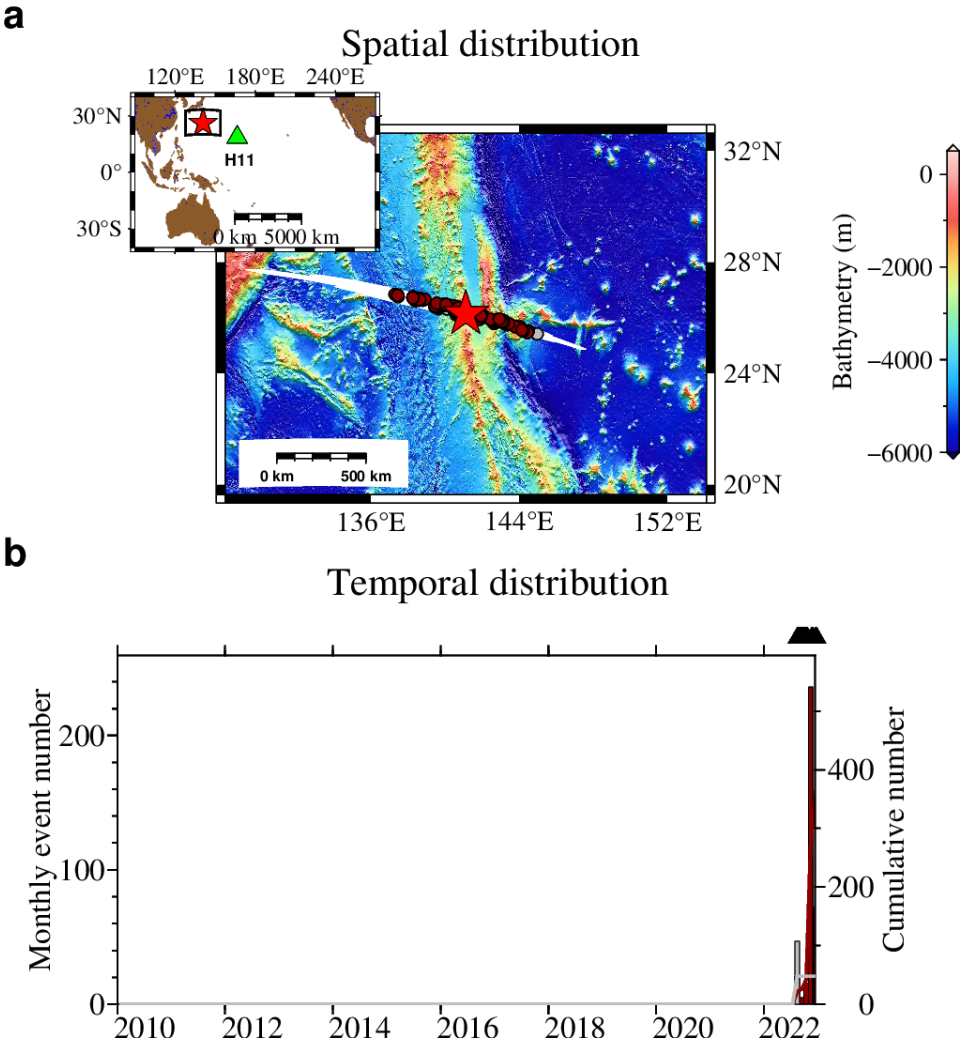

**Supplementary Fig. 9 | Same as Supplementary Fig. 8, except for explosive submarine volcanic eruptions in Kaitoku.**

Verification of explosive submarine volcanic eruptions  
in Ahyi

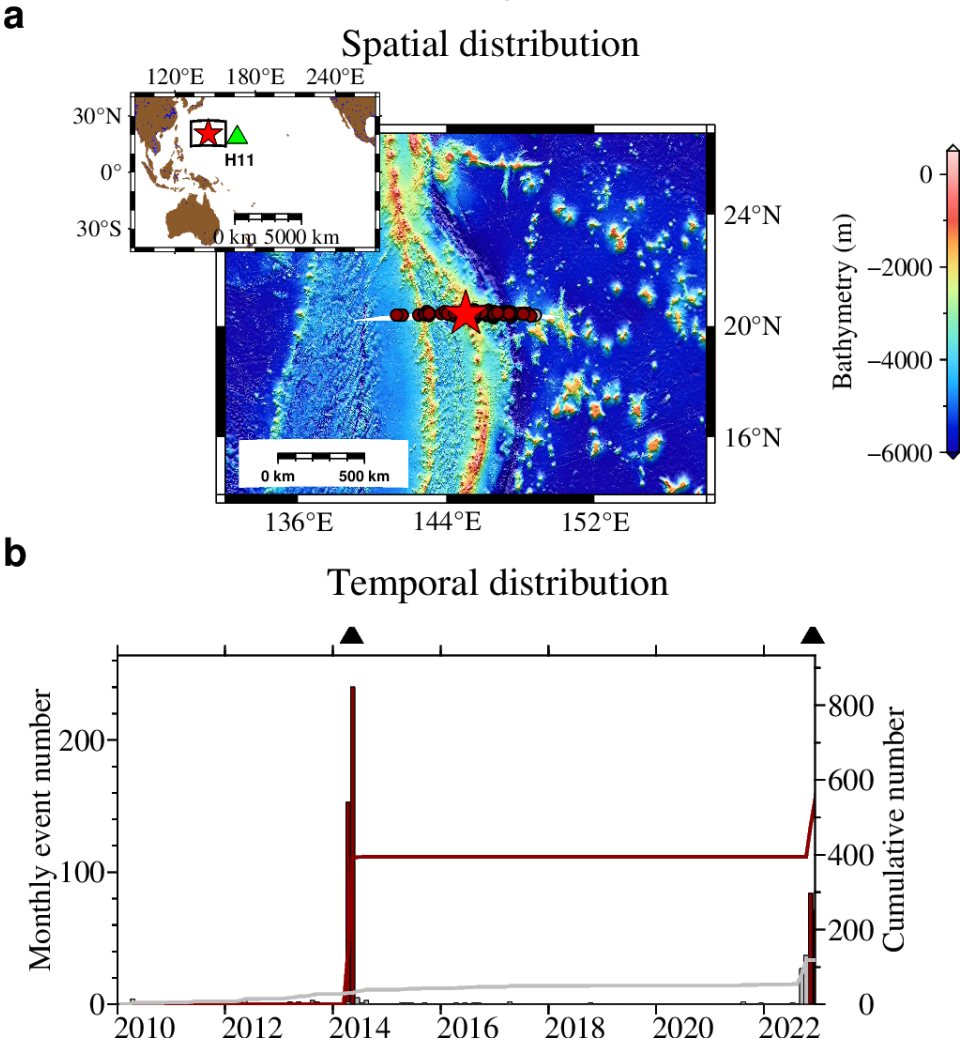

**Supplementary Fig. 10 | Same as Supplementary Fig. 8, except for explosive submarine volcanic eruptions in Ahyi.**

Verification of explosive submarine volcanic eruptions  
in South Sarigon

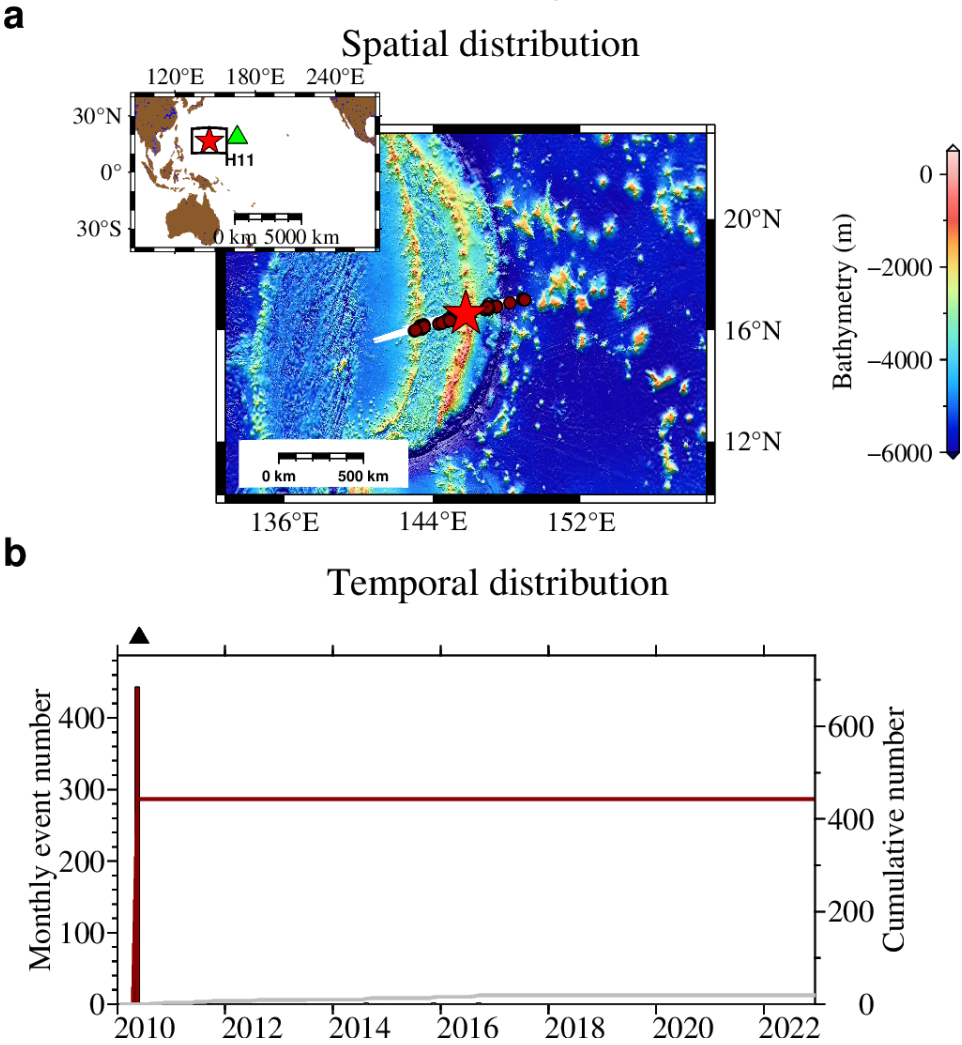

**Supplementary Fig. 11 | Same as Supplementary Fig. 8, except for explosive submarine volcanic eruptions in South Sarigon.**

## 163    **Supplementary References**

- 164    1        Hanson, J. *et al.* Operational processing of hydroacoustics at the Prototype International  
165                   Data Center. *pure and applied geophysics* **158**, 425-456 (2001).
- 166    2        Green, D. N. *et al.* Hydroacoustic, infrasonic and seismic monitoring of the submarine  
167                   eruptive activity and sub-aerial plume generation at South Sarigan, May 2010. *Journal*  
168                   *of Volcanology and Geothermal Research* **257**, 31-43 (2013).
- 169    3        Bohnenstiehl, D. R., Dziak, R. P., Matsumoto, H. & Conder, J. A. Acoustic response  
170                   of submarine volcanoes in the Tofua Arc and northern Lau Basin to two great  
171                   earthquakes. *Geophysical Journal International* **196**, 1657-1675 (2014).
- 172    4        Tepp, G. *et al.* Hydroacoustic, seismic, and bathymetric observations of the 2014  
173                   submarine eruption at Ahyi seamount, Mariana Arc. *Geochemistry, Geophysics,*  
174                   *Geosystems* **20**, 3608-3627 (2019).
- 175    5        Talandier, J., Hyvernaud, O., Hébert, H., Maury, R. C. & Allgeyer, S. Seismic and  
176                   hydroacoustic effects of the May 29, 2010 submarine South Sarigan volcanic explosion:  
177                   Energy release and interpretation. *Journal of Volcanology and Geothermal Research*  
178                   **394**, 106819 (2020).
- 179    6        Bromirski, P. D., Duennebie, F. K. & Stephen, R. A. Mid - ocean microseisms.  
180                   *Geochemistry, Geophysics, Geosystems* **6** (2005).
- 181    7        Reeves, R. R. The origins and character of ‘aboriginal subsistence’whaling: a global  
182                   review. *Mammal Review* **32**, 71-106 (2002).
- 183    8        Širović, A., Wiggins, S. M. & Oleson, E. M. Ocean noise in the tropical and subtropical  
184                   Pacific Ocean. *The Journal of the Acoustical Society of America* **134**, 2681-2689  
185                   (2013).
- 186    9        ZHAO, M. H. *et al.* Large Volume Air - Gun Sources and Its Seismic Waveform  
187                   Characters. *Chinese Journal of Geophysics* **51**, 400-408 (2008).
- 188    10        Dragoset, B. Introduction to air guns and air-gun arrays. *The leading edge* **19**, 892-897  
189                   (2000).
- 190    11        Yoshida, K. *et al.* Variety of the drift pumice clasts from the 2021 Fukutoku - Oka -  
191                   no - Ba eruption, Japan. *Island Arc* **31**, e12441 (2022).
- 192    12        Matsumoto, H. *et al.* Interpretation of detections of volcanic activity at Ioto Island  
193                   obtained from in situ seismometers and remote hydrophones of the International  
194                   Monitoring System. *Scientific Reports* **9**, 19519 (2019).
- 195    13        Global Volcanism Program. Report on Fukutoku-Oka-no-Ba (Japan) (Bennis, K.L.,  
196                   and Venzke, E., eds.). *Bulletin of the Global Volcanism Network* **46**, Smithsonian  
197                   Institution, doi:<https://doi.org/10.5479/si.GVP.BGVN202111-284130>. (2021).
- 198    14        Global Volcanism Program. Report on Fukutoku-Oka-no-Ba (Japan) (Sennert, S, ed.).  
199                   *Weekly Volcanic Activity Report* **29 December-4 January 2022**, Smithsonian  
200                   Institution and US Geological Survey (2021).
- 201    15        Tozer, B. *et al.* Global bathymetry and topography at 15 arc sec: SRTM15+. *Earth and*  
202                   *Space Science* **6**, 1847-1864 (2019).

204
